# Supplementary material for: Fabrication and characterization of single walled carbon nanotubes-iron phthalocyanine nano-composite: surface properties and electron transport dynamics of its self assembled monolayer film
Source: Royal Society of Chemistry journal article supplement (doi:10.1039/c0nj00395f), 2010-01-01
Supplement: c0nj00395f.pdf [file c0nj00395f.pdf]

## Supporting document

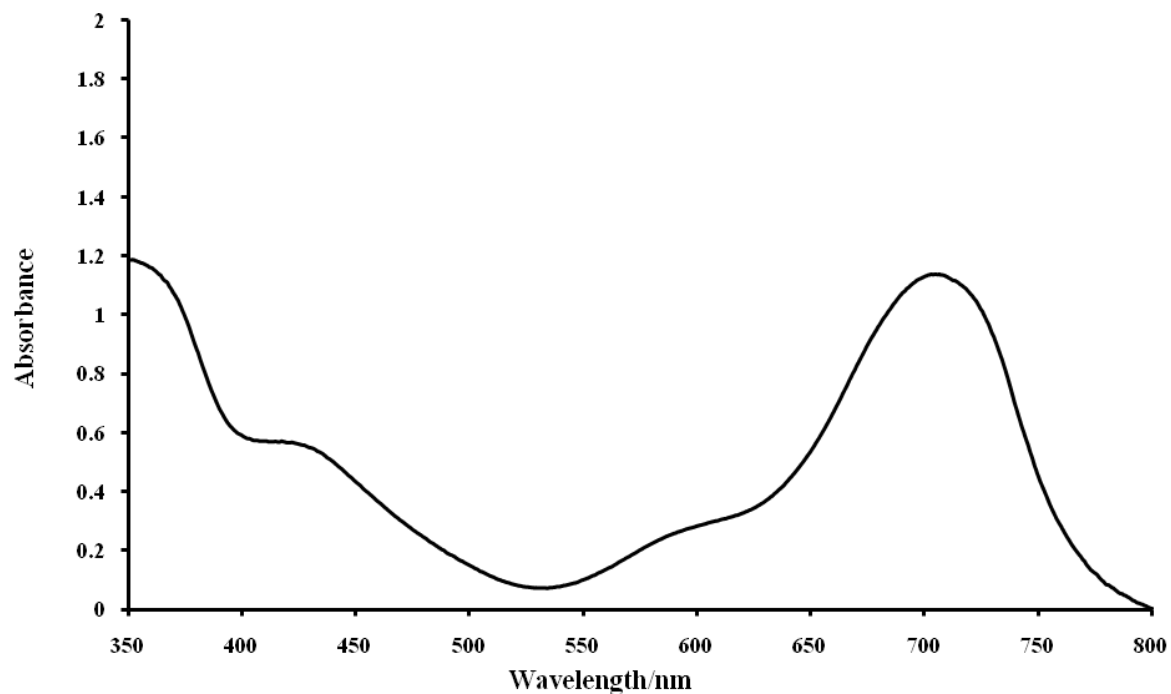

Fig. 1: UV-Vis spectrum of  $5.50 \times 10^{-6}$  M of complex 2

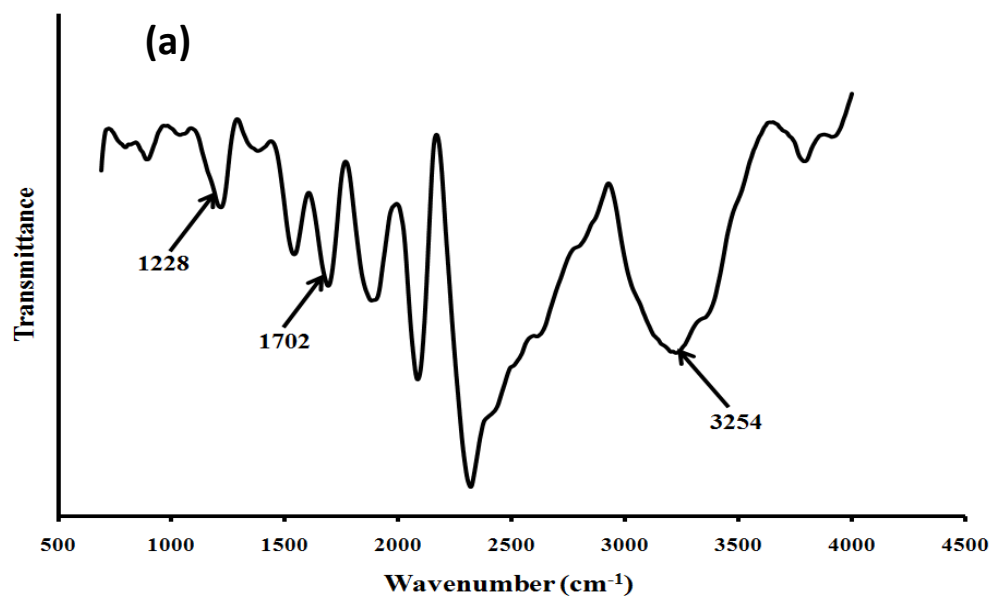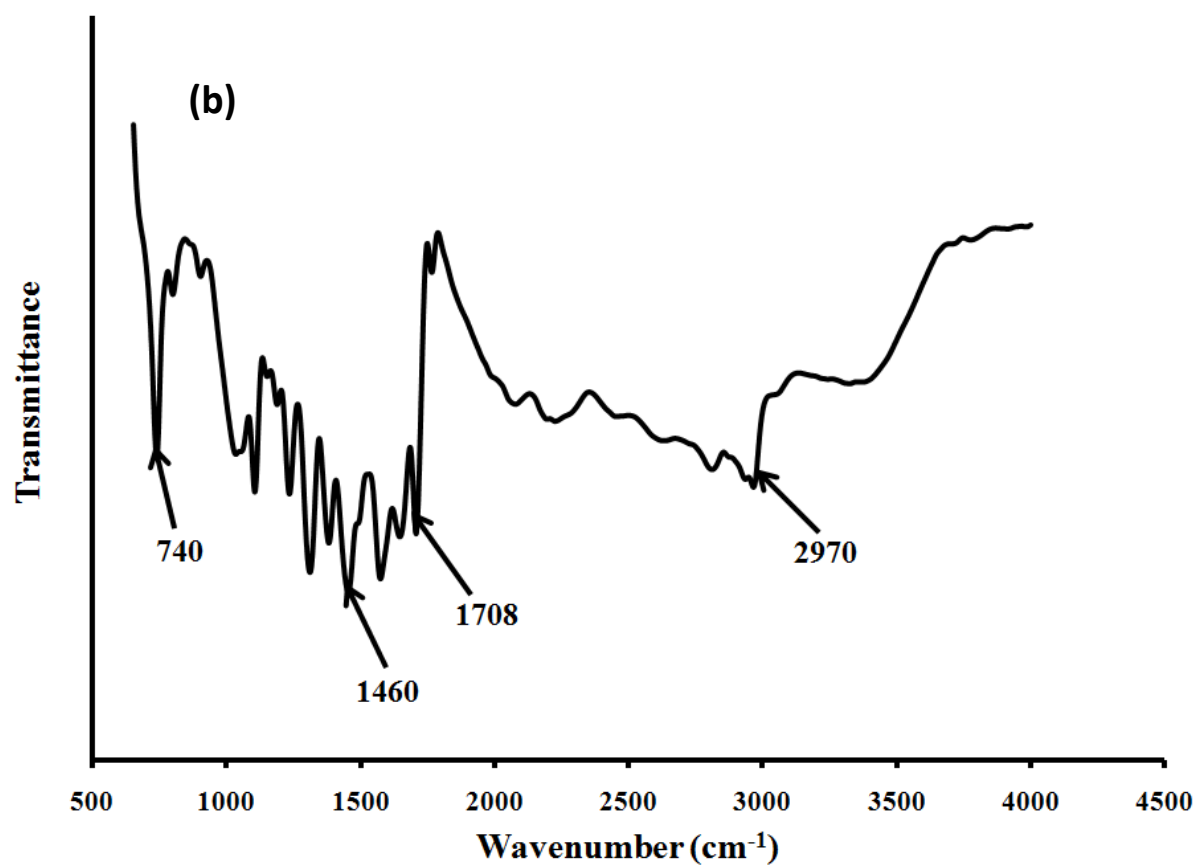

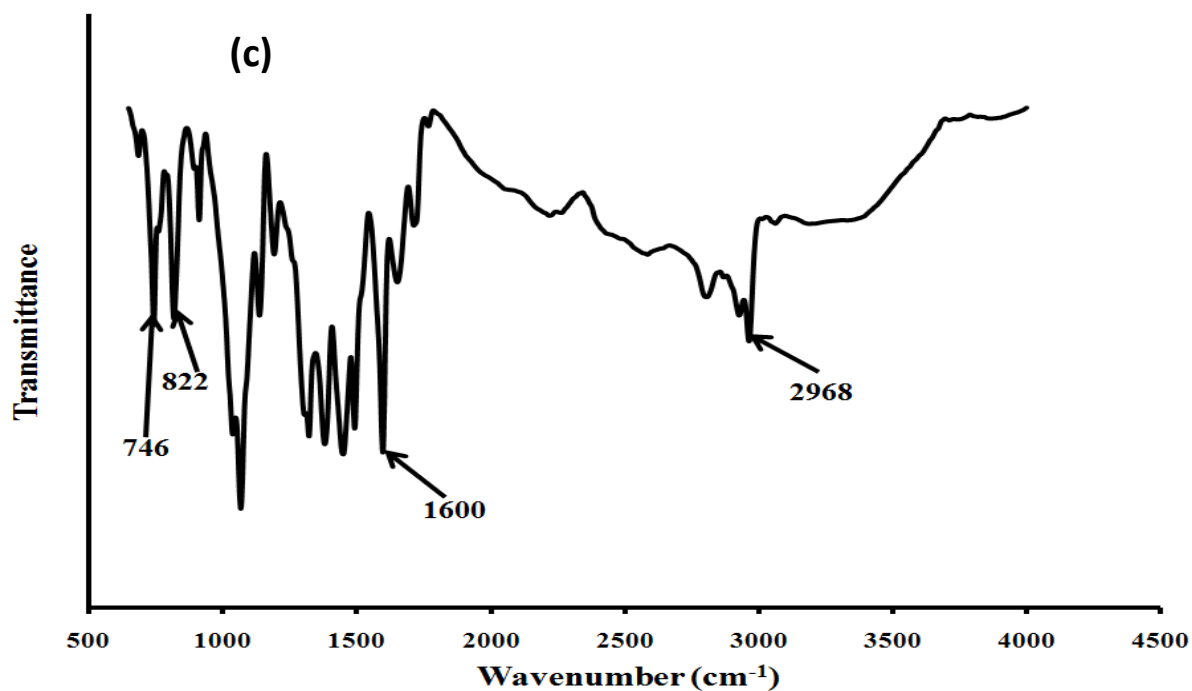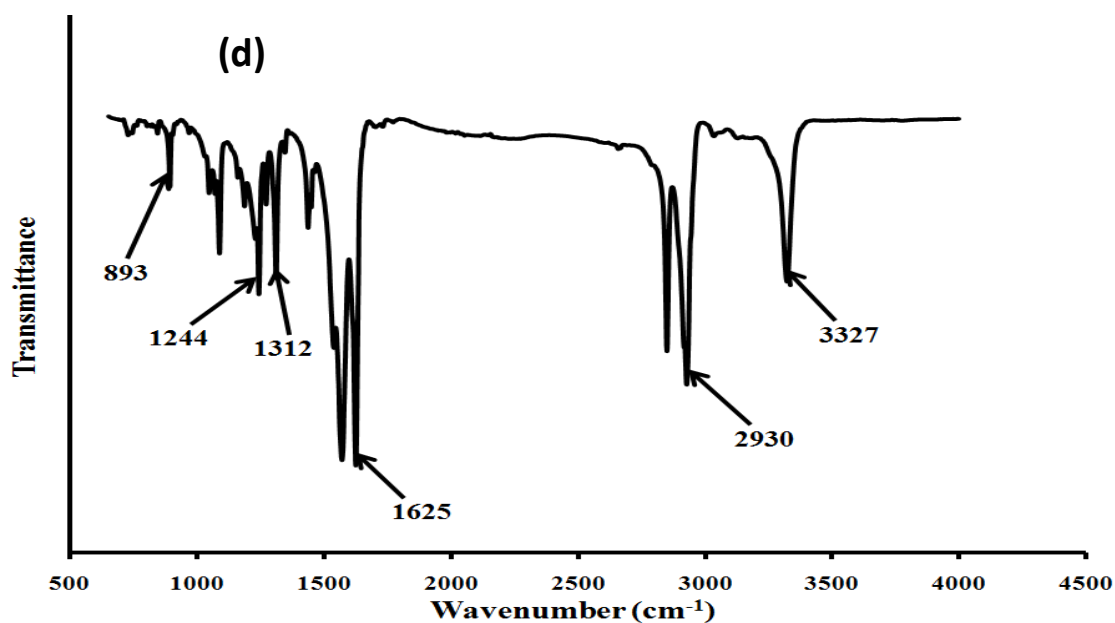

Figure 2: IR spectra of (a) SWCNT-COOH and (b) complex 2, (c) mixture of SWCNT and complex-2 and (d) SWCNT-2 nano-composite.

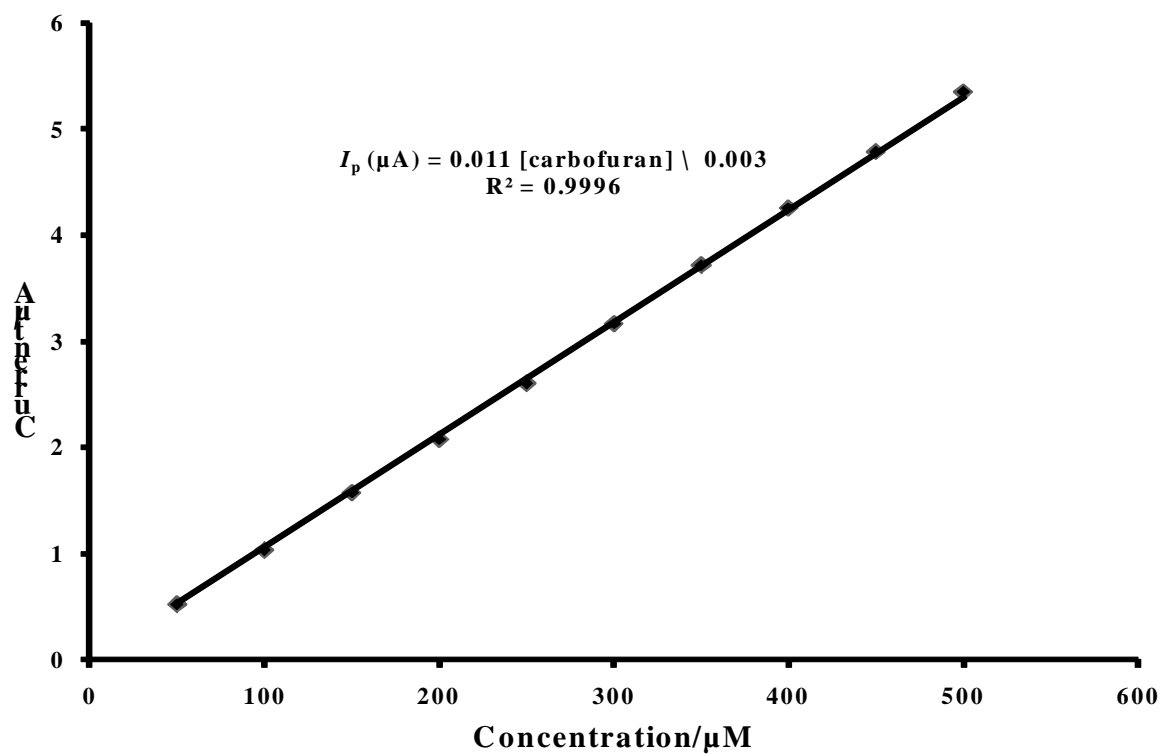

Fig. 3 Calibration curve of carbofuran on SWCNT-2-SAM
